# Supplementary material
Source: publisher figshare collection journal article supplement (https://frontiersin.figshare.com/ndownloader/files/27697197)
Supplement: Supplementary file 1 [file 27697197]

## Sheet: GML
Provinces	DMU	I1	I2	I3	I4	I5	I6	O1
Beijing	2016	12.29	3.27	1.07	417.76	10.9219	338.1	1020.27
Beijing	2017	11.32	3.46	1.36	372.25	10.5239	308.3	1066.89
Tianjin	2016	0.03	5.84	0.16	611.51	9.678	494.4	807.93
Tianjin	2017	0.07	5.91	1.61	603.41	9.54695	382.1	805.595
Hebei	2016	22.26	209.32	26.54	2372.47	123.279	6083.9	3264.52
Hebei	2017	18.64	257.54	56.22	2484.51	121.51	5373.4	3441.74
Shanxi	2016	37.5	120.28	14.45	2362.85	57.2139	1534	1797.18
Shanxi	2017	42.22	146.06	46.54	2589.12	56.725	1418.7	1990.61
Inner Mongolia	2016	27.48	464.18	83.26	3374.88	35.1367	2794.2	2605.03
Inner Mongolia	2017	19.99	551.43	114.19	3750.33	34.499	2813.5	2891.87
Liaoning	2016	47.03	128.93	3.41	1399.56	53.2173	4421.8	2037.4
Liaoning	2017	34.53	143.5	6.17	1408.9	51.0176	3851.6	2135.5
Ji Lin	2016	82.42	84.66	0.91	592.28	44.1268	2724.9	667.627
Ji Lin	2017	67.09	87.64	1.86	642.85	42.304	2064.3	702.98
Heilongjiang	2016	16.87	79.62	0.44	803.48	56.1238	5197.8	896.618
Heilongjiang	2017	18.62	90.7	1.22	805.77	55.2488	5586.6	928.57
Shanghai	2016	0	6.7	0.45	800.14	10.7214	285.1	1486.02
Shanghai	2017	0	16.64	0.62	841.99	10.682	292.6	1526.77
Jiangsu	2016	17.35	94.12	41.15	4403.02	94.1271	7235.1	5458.95
Jiangsu	2017	29.02	116.65	61.94	4529.84	90.0962	7161.2	5807.89
Zhejiang	2016	274.41	23.42	22.17	2374.01	66.1279	3146.1	3873.19
Zhejiang	2017	198.73	23.59	23.52	2554.51	65.0184	3093.4	4192.63
Anhui	2016	63.17	34.17	20.67	2134.69	106.129	4655.5	1794.98
Anhui	2017	52.97	39.74	45.25	2318.32	104.492	4597.9	1921.48
Fujian	2016	644.39	50.26	3.46	900.2	52.1238	4155.7	1968.58
Fujian	2017	454.61	62.4	2.38	1121.19	49.448	3947.2	2112.72
Jiangxi	2016	198.53	18.77	11.13	856.93	77.1243	3130.3	1182.5
Jiangxi	2017	144.17	29.84	15.39	939.42	75.3699	3069	1293.98
Shandong	2016	13.92	142.51	29.96	5142.88	142.569	9325.9	5390.75
Shandong	2017	6.26	166.08	73.6	4913.85	141.671	9140.4	5430.16
Henan	2016	95.54	18.01	13.06	2526.05	175.684	7799.7	2989.15
Henan	2017	102.32	33.29	26.91	2575.94	171.123	7562.5	3166.17
Hubei	2016	1410.72	40.4	11.4	1016.5	88.2819	6278.4	1763.11
Hubei	2017	1499.39	52.18	11.54	1043.1	86.2782	6129.7	1869
Hunan	2016	621.51	39.63	0.63	723.32	114.735	6081.9	1495.65
Hunan	2017	597.37	45.24	4.73	786.52	111.816	5213.5	1581.51
Guangdong	2016	443.34	47.44	4.47	2971.7	122.545	6078.4	5610.13
Guangdong	2017	307.65	55.07	10.55	3329.31	120.953	5969.9	5958.97
Guangxi	2016	654.38	13.81	0.84	574.49	90.6788	4591.4	1359.65
Guangxi	2017	629.34	24.29	2.69	617.35	89.1157	4698.7	1442.34
Hainan	2016	19.13	6.41	2.14	199.95	14.1643	1470.4	287.312
Hainan	2017	20.81	5.47	3.01	195.45	13.9541	1488.9	304.828
Chongqing	2016	247.18	4.65	0	449.37	40.8723	1968.3	924.895
Chongqing	2017	250.99	6	0.55	468.89	39.6748	1902.5	992.649
Sichuan	2016	2852.07	17.9	6.06	397.83	148.765	6831.1	2101.02
Sichuan	2017	3041.2	37.8	16.92	384.45	146.739	6955.5	2205.18
Guizhou	2016	733.73	55.17	0.88	1114.21	70.9896	3097.2	1241.78
Guizhou	2017	699.91	60.15	4.61	1134.42	69.4112	3413.9	1384.89
Yunnan	2016	2278.15	155.32	21.03	238.04	93.1865	3633.1	1410.52
Yunnan	2017	2493.43	194.4	27.58	239.66	91.9172	3872.9	1538.1
Tibet	2016	48.78	0	2.88	1.82	8.41289	173	49.2205
Tibet	2017	48.29	0	4.49	1.62	8.36526	178.2	58.1888
Shaanxi	2016	125.14	37.46	13.34	1581.48	60.1271	2985.8	1357.06
Shaanxi	2017	142.13	50.86	34.25	1586.05	59.5194	3077.6	1494.75
Gansu	2016	313.51	136.44	60.19	704.18	51.7772	1778	1065.15
Gansu	2017	374.15	187.6	73.48	713.92	50.5651	1559.6	1164.37
Qinghai	2016	300.85	10.01	89.91	152.19	11.0124	338.8	637.512
Qinghai	2017	334.22	18.61	112.57	161.19	10.0785	364.1	687.014
Ningxia	2016	14.02	125.47	51.34	953.56	10.4819	493.6	886.911
Ningxia	2017	15.45	149.32	71.79	1144.39	10.294	517.4	978.303
Xinjiang	2016	224.75	196.55	78.47	2219.36	45.1287	2969.7	2316.46
Xinjiang	2017	243.5	288.76	109.64	2368.88	44.4555	3326.6	2000.94

## Sheet: SEM
Provinces	A11	A12	A13	A21	A22	A23	A31	A32	A33
Beijing	255.02	0	15.41	11.32	3.46	1.36	28014.9	40830	666.39
Tianjin	0	3102.4	21.5	0.07	5.91	1.61	18549.2	26359.2	749.39
Hebei	6019.95	539.1	7.39	18.64	257.54	56.22	34016.3	15189.6	498.958
Shanxi	87221.4	0	46.76	42.22	146.06	46.54	15528.4	15119.7	589.89
Inner Mongolia	90597.3	12.2	0.19	19.99	551.43	114.19	16096.2	18692.9	1197.44
Liaoning	3630.22	1044.2	5.11	34.53	143.5	6.17	23409.2	20817.8	499.999
Ji Lin	1638.77	420.9	18.58	67.09	87.64	1.86	14944.5	15998.1	258.164
Heilongjiang	6195.75	3420.3	40.54	18.62	90.7	1.22	15902.7	15903.4	242.89
Shanghai	0	6.8	1.71	0	16.64	0.62	30633	42173.6	777.335
Jiangsu	1278.47	156.1	2.94	29.02	116.65	61.94	85869.8	24775.5	758.64
Zhejiang	0	0	6.14	198.73	23.59	23.52	51768.3	29775	826.655
Anhui	11724.4	0	2.6	52.97	39.74	45.25	27018	15154.3	314.481
Fujian	1129.54	0	0	454.61	62.4	2.38	32182.1	21217.9	589.322
Jiangxi	938.92	0	0.21	144.17	29.84	15.39	20006.3	15099.7	298.213
Shandong	13159.6	2234.9	4.15	6.26	166.08	73.6	72634.1	19008.3	583.33
Henan	11750.6	282.9	2.98	102.32	33.29	26.91	44552.8	14203.7	337.113
Hubei	315.5	55.5	1.27	1499.39	52.18	11.54	35478.1	16472.5	328.297
Hunan	1938.02	1435.2	0	597.37	45.24	4.73	33903	16004.9	249.371
Guangdong	0	44.1	89.23	307.65	55.07	10.55	89705.2	23420.7	631.108
Guangxi	442.68	30	0.21	629.34	24.29	2.69	18523.3	14082.3	305.645
Hainan	0	0	1.1	20.81	5.47	3.01	4462.54	15733.3	364.679
Chongqing	1194.2	8.7	60.7	250.99	6	0.55	19424.7	16568.7	353.507
Sichuan	4798.51	0	356.39	3041.2	37.8	16.92	36980.2	14231	269.945
Guizhou	16343.8	0	4.15	699.91	60.15	4.61	13540.8	11083.1	375.308
Yunnan	4674.98	0	0.04	2493.43	194.4	27.58	16376.3	12577.9	343.097
Tibet	0	0	0	48.29	0	4.49	1310.92	9740.43	204.114
Shaanxi	57102.5	3489.8	419.4	142.13	50.86	34.25	21898.8	14371.5	404.096
Gansu	3738.45	47	0.6	374.15	187.6	73.48	7459.9	10954.4	457.19
Qinghai	841.74	228	64.01	334.22	18.61	112.57	2624.83	12947.8	1254.36
Ningxia	7643.59	0.7	0	15.45	149.32	71.79	3443.56	14565.8	1620.43
Xinjiang	17782.3	2591.8	307.04	243.5	288.76	109.64	10882	13669.6	976.067
